# Supplementary material for: Mean and extreme precipitation over European river basins better simulated in a 25km AGCM
Source: Copernicus journal article supplement (doi:10.5194/hess-2017-732), 2018-01-16
Supplement: Supplementary file 1 [file hess-2017-732-supplement.pdf]

## Contents

### List of Tables

|    |                                                                                                                        |   |
|----|------------------------------------------------------------------------------------------------------------------------|---|
| S1 | River basin names, surface areas in km <sup>2</sup> , and HYDRO1k Pfafstetter codes (Verdin and Verdin, 1999). . . . . | 2 |
|----|------------------------------------------------------------------------------------------------------------------------|---|

### List of Figures

|    |     |                                                                                                                                                                                                                                                                                                                                                                                      |    |
|----|-----|--------------------------------------------------------------------------------------------------------------------------------------------------------------------------------------------------------------------------------------------------------------------------------------------------------------------------------------------------------------------------------------|----|
| 5  | S1  | Illustration of GEV distribution parameters in a Gumbel diagram. (a) Varying the location parameter $\mu$ for constant $\sigma$ and $\xi$ , (b) varying the scale parameter $\sigma$ for constant $\mu$ and $\xi$ , and (c) varying the shape parameter $\xi$ for constant $\mu$ and $\sigma$ . . . . .                                                                              | 3  |
|    | S2  | Estimated GEV parameters for March–May daily basin-average precipitation, (a–c) location parameter $\mu$ and (d–f) scale parameter $\sigma$ , both in mm day <sup>-1</sup> , and for (a,d) observations (E-OBS), (b,e) N96, and (c,f) N512 resolution. Stippling (hatching) shows statistically significant differences between the models and E-OBS (between N512 and N96). . . . . | 4  |
| 10 | S3  | As Fig. S2 but for autumn (September–November). . . . .                                                                                                                                                                                                                                                                                                                              | 5  |
|    | S4  | Standard deviation of 2–8 day band-pass filtered 500 hPa geopotential height (m) during spring (March–May). (a) ERA-Interim reanalysis, (b,d,g) model (HadGEM3-GA3.0) at resolutions N96, N216, and N512, (c,f,j) model biases with respect to E-OBS, and (e,h,i) differences between model resolutions. Stippling shows statistically significant differences. . . . .              | 6  |
| 15 | S5  | Spring (March–May) mean precipitation. (a) Observations (E-OBS), (b,d,g) model (HadGEM3-GA3.0) at resolutions N96, N216, and N512, (c,f,j) model biases with respect to E-OBS, and (e,h,i) differences between model resolutions. Stippling shows statistically significant differences. . . . .                                                                                     | 7  |
| 20 | S6  | As Fig. S4 but for summer (June–August). . . . .                                                                                                                                                                                                                                                                                                                                     | 8  |
|    | S7  | As Fig. S5 but for summer (June–August). . . . .                                                                                                                                                                                                                                                                                                                                     | 9  |
|    | S8  | As Fig. S4 but for autumn (September–November). . . . .                                                                                                                                                                                                                                                                                                                              | 10 |
|    | S9  | As Fig. S5 but for autumn (September–November). . . . .                                                                                                                                                                                                                                                                                                                              | 11 |
| 25 | S10 | Spring (March–May) precipitation in mm day <sup>-1</sup> in (a) observations (E-OBS), (b) the N480 model with N96 orography, and (d) the N480 control simulation. (c,f) Model bias with respect to E-OBS, (e) difference between the two model simulations. Stippling shows statistically significant differences. . . . .                                                           | 12 |
|    | S11 | As Fig. S10 but for summer (June–August). . . . .                                                                                                                                                                                                                                                                                                                                    | 13 |
|    | S12 | As Fig. S10 but for autumn (September–November). . . . .                                                                                                                                                                                                                                                                                                                             | 14 |
| 30 | S13 | Spring (March–May) ratios of fitted GEV parameters for (a,b) the location parameter $\mu$ and for (c,d) the scale parameter $\sigma$ , between (a,c) the N512 and N96 simulations and between (b,d) the N480 control simulation and the N480 simulation with N96 orography. Hatching shows statistically significant differences. . . . .                                            | 15 |
|    | S14 | As Fig. S13 but for summer (June–August). . . . .                                                                                                                                                                                                                                                                                                                                    | 16 |
|    | S15 | As Fig. S13 but for autumn (September–November). . . . .                                                                                                                                                                                                                                                                                                                             | 17 |

**Table S1.** River basin names, surface areas in km<sup>2</sup>, and HYDRO1k Pfafstetter codes (Verdin and Verdin, 1999).

|    | Basin            | Area    | Code         |
|----|------------------|---------|--------------|
| 1  | Danube           | 781238  | 8            |
| 2  | Daugava          | 86819   | 936          |
| 3  | Dnieper          | 496580  | 6            |
| 4  | Dniester         | 72304   | 76           |
| 5  | Don              | 426521  | 4            |
| 6  | Duero            | 96438   | 9118         |
| 7  | Ebro             | 85323   | 9116         |
| 8  | Elbe             | 139773  | 916          |
| 9  | Garonne/Dordogne | 79899   | 91196        |
| 10 | Guadalquivir     | 56671   | 91174        |
| 11 | Guadiana         | 65774   | 91176        |
| 12 | Kemijoki         | 55959   | 9538, 9542   |
| 13 | Kuban            | 58159   | 398          |
| 14 | Loire            | 116256  | 912          |
| 15 | Mezen            | 76902   | 976          |
| 16 | Neman            | 97499   | 934          |
| 17 | Neva             | 235441  | 94           |
| 18 | Northern Dvina   | 288979  | 96           |
| 19 | Odra             | 116748  | 918          |
| 20 | Onega            | 65997   | 958          |
| 21 | Pechora          | 289205  | 98           |
| 22 | Po               | 87239   | 9112         |
| 23 | Rhine            | 194228  | 914          |
| 24 | Rhone            | 84878   | 9114         |
| 25 | Seine            | 86223   | 9132         |
| 26 | Severn           | 7818    | 91372        |
| 27 | Southern Bug     | 60246   | 72           |
| 28 | Tagus            | 70091   | 91178        |
| 29 | Thames           | 12424   | 9136         |
| 30 | Upper Danube     | 208085  | 89           |
| 31 | Ural             | 277453  | 263, 265–269 |
| 32 | Vistula          | 194277  | 92           |
| 33 | Volga            | 1446473 | 27–29        |

## References

Verdin, K. and Verdin, J.: A topological system for delineation and codification of the Earth's river basins, *J. Hydrol.*, 218, 1–12, doi:10.1016/S0022-1694(99)00011-6, <http://linkinghub.elsevier.com/retrieve/pii/S0022169499000116>, 1999.

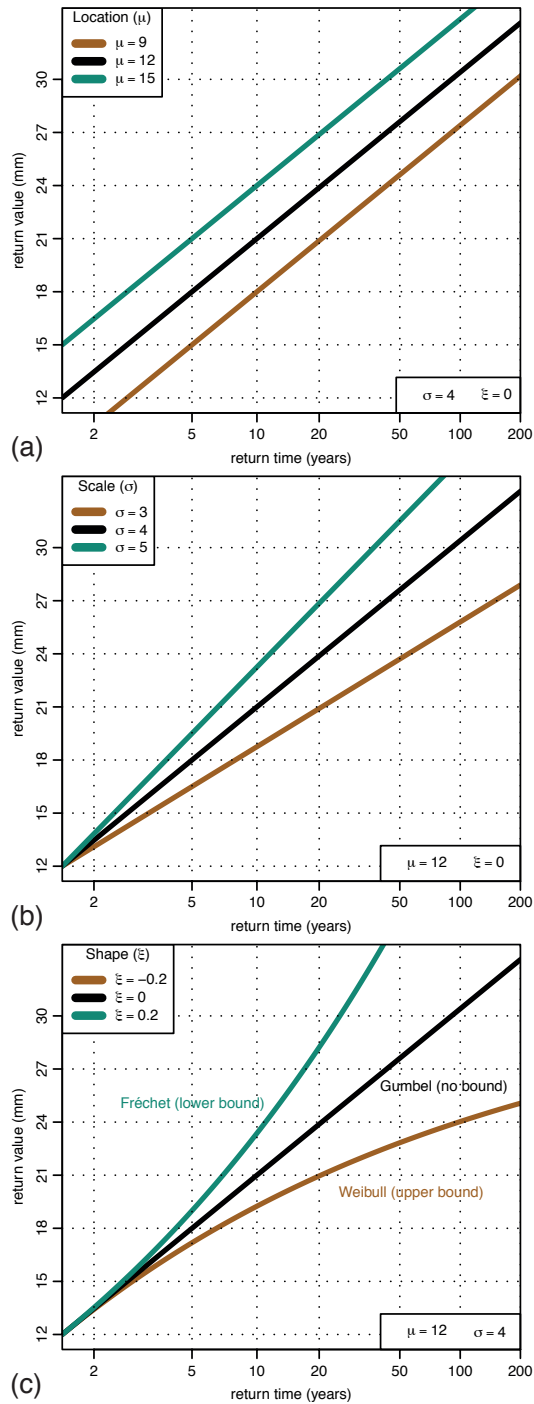

**Figure S1.** Illustration of GEV distribution parameters in a Gumbel diagram. (a) Varying the location parameter  $\mu$  for constant  $\sigma$  and  $\xi$ , (b) varying the scale parameter  $\sigma$  for constant  $\mu$  and  $\xi$ , and (c) varying the shape parameter  $\xi$  for constant  $\mu$  and  $\sigma$ .

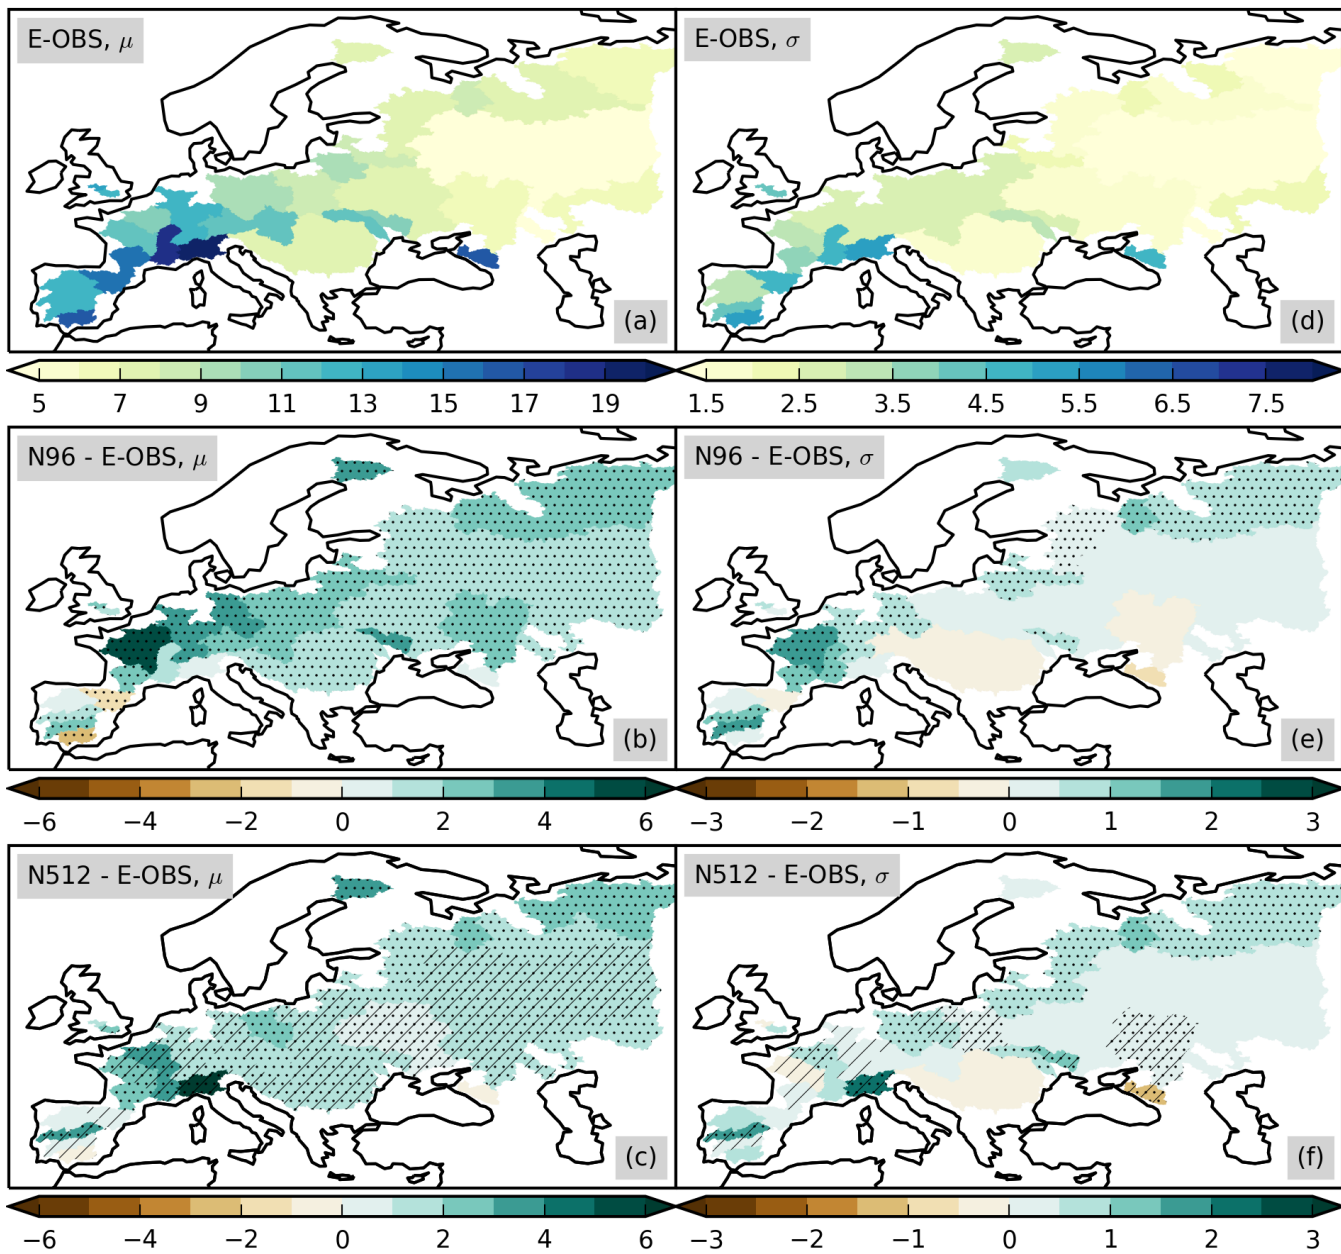

**Figure S2.** Estimated GEV parameters for March–May daily basin-average precipitation, (a–c) location parameter  $\mu$  and (d–f) scale parameter  $\sigma$ , both in  $\text{mm day}^{-1}$ , and for (a,d) observations (E-OBS), (b,e) N96, and (c,f) N512 resolution. Stippling (hatching) shows statistically significant differences between the models and E-OBS (between N512 and N96).



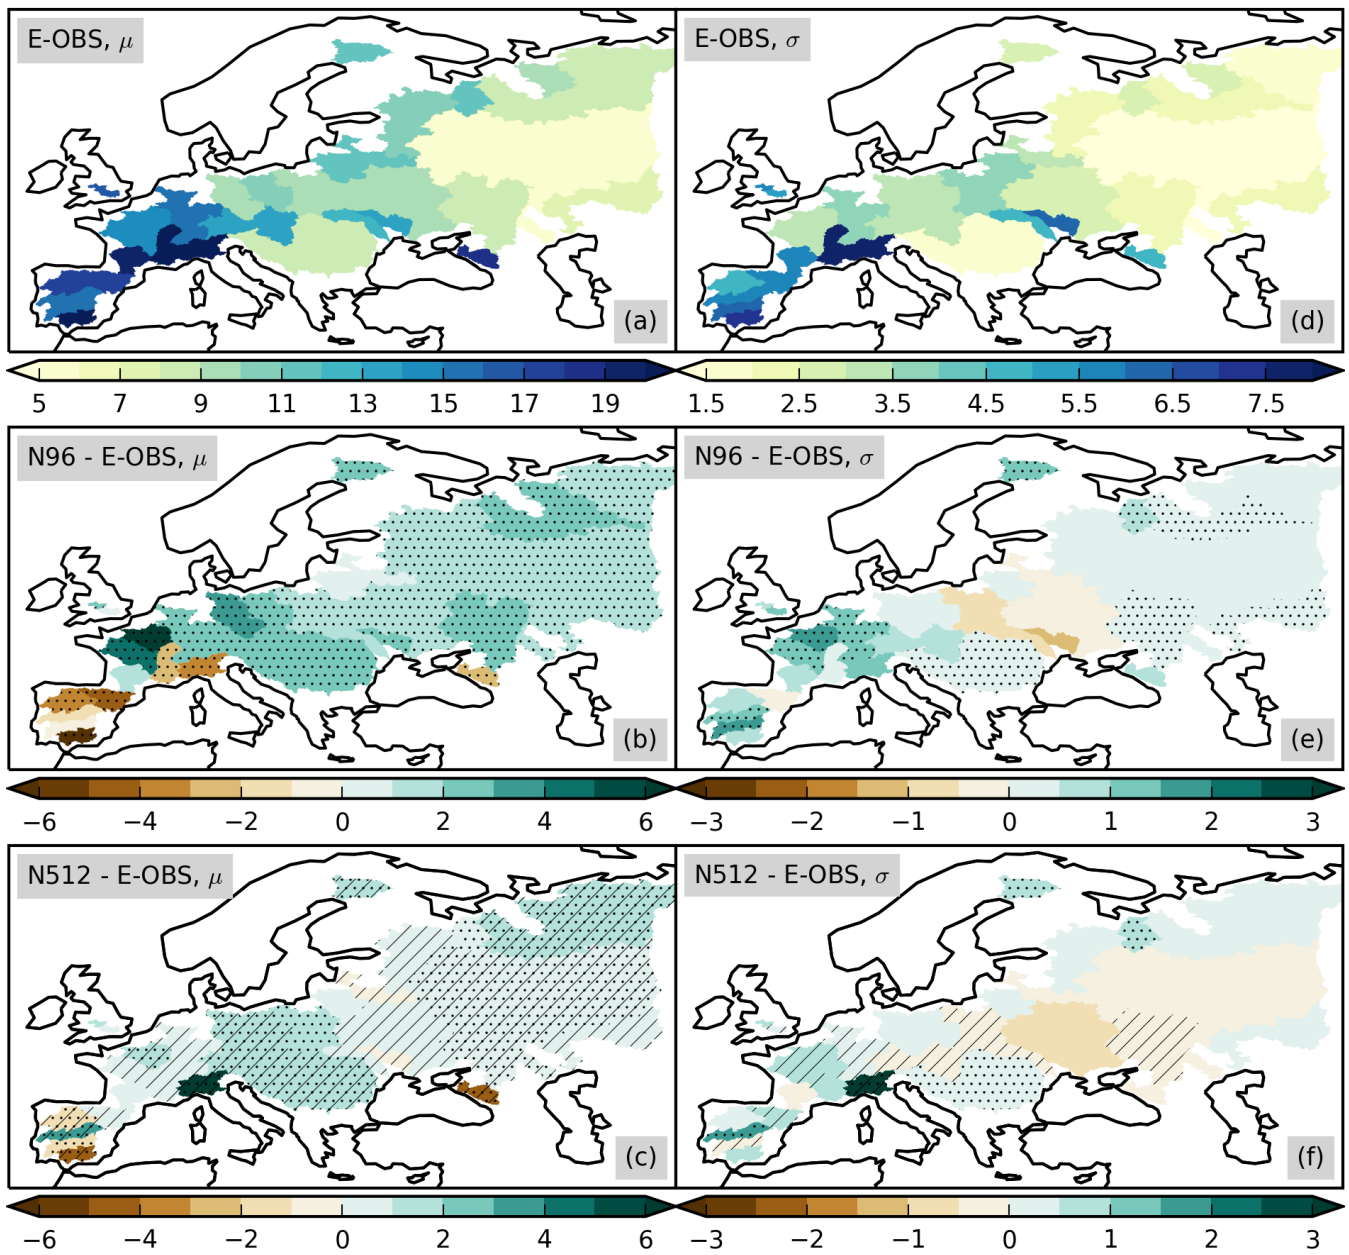

**Figure S3.** As Fig. S2 but for autumn (September–November).

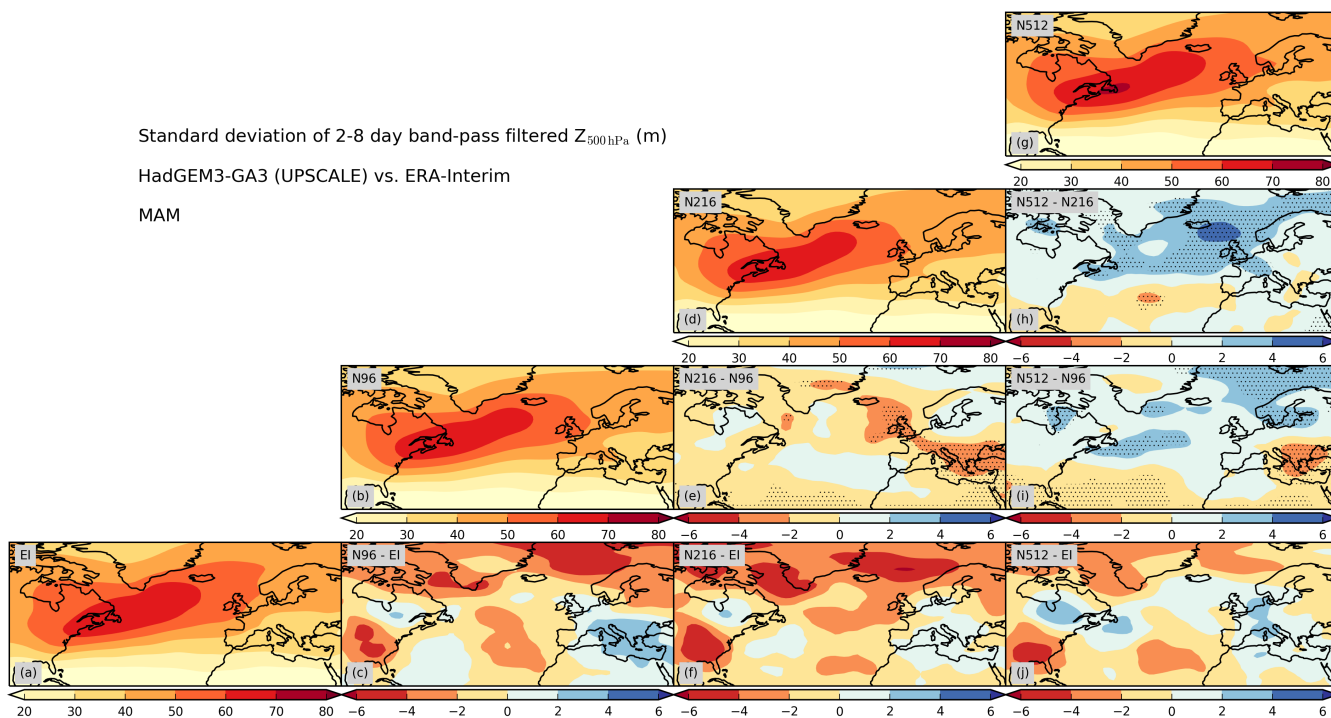

**Figure S4.** Standard deviation of 2–8 day band-pass filtered 500 hPa geopotential height (m) during spring (March–May). (a) ERA-Interim reanalysis, (b,d,g) model (HadGEM3-GA3.0) at resolutions N96, N216, and N512, (c,f,j) model biases with respect to E-OBS, and (e,h,i) differences between model resolutions. Stippling shows statistically significant differences.

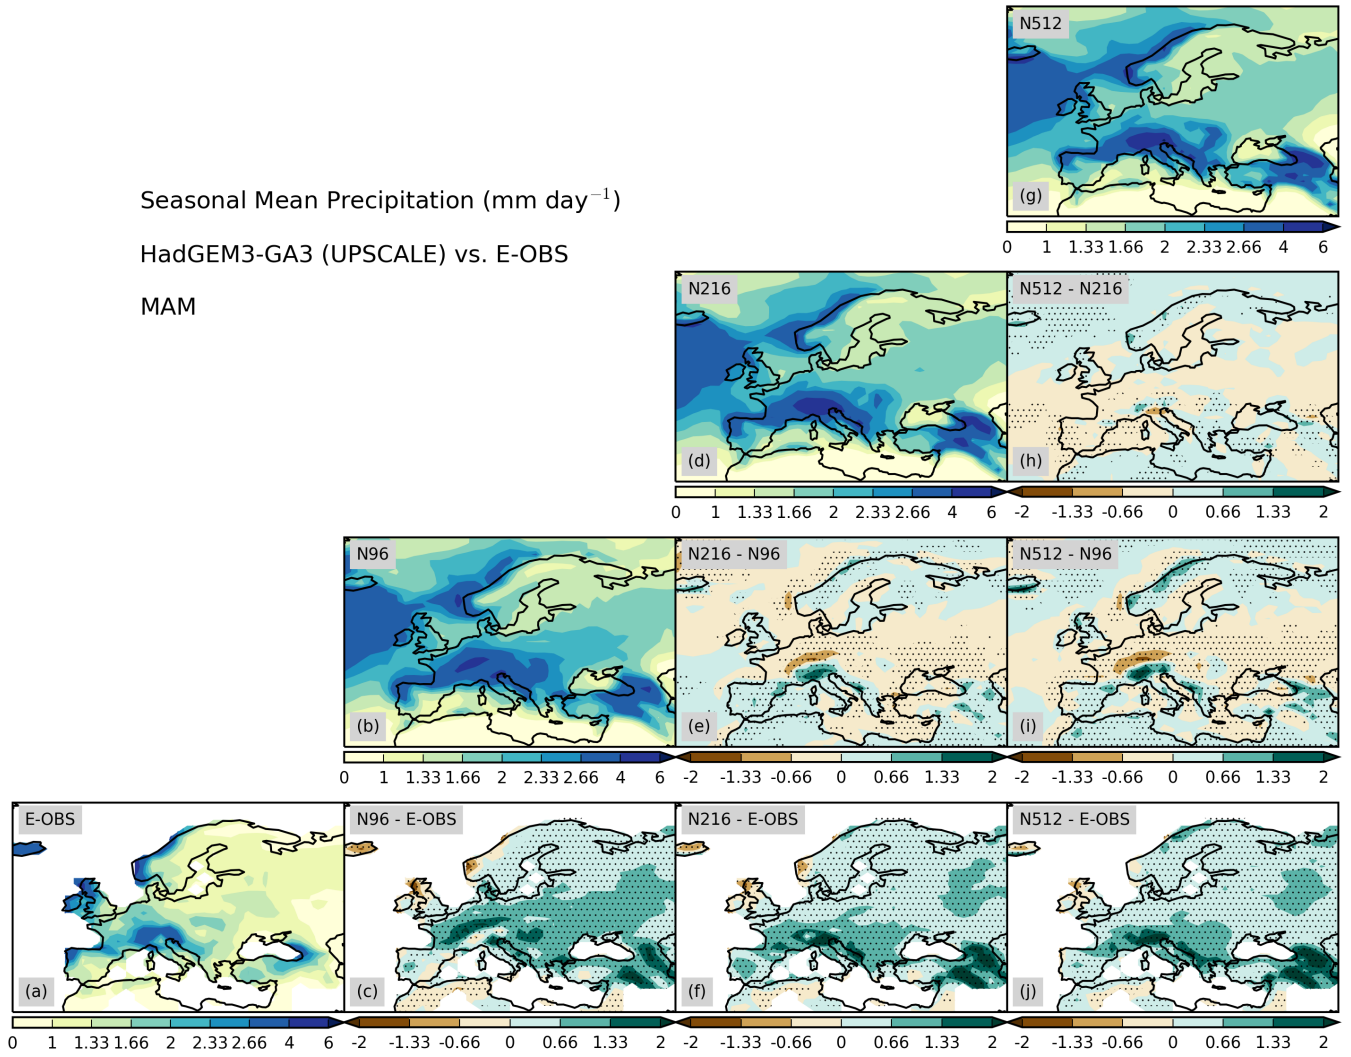

**Figure S5.** Spring (March–May) mean precipitation. (a) Observations (E-OBS), (b,d,g) model (HadGEM3-GA3.0) at resolutions N96, N216, and N512, (c,f,j) model biases with respect to E-OBS, and (e,h,i) differences between model resolutions. Stippling shows statistically significant differences.

Standard deviation of 2-8 day band-pass filtered  $Z_{500hPa}$  (m)

HadGEM3-GA3 (UPSCALE) vs. ERA-Interim

JJA

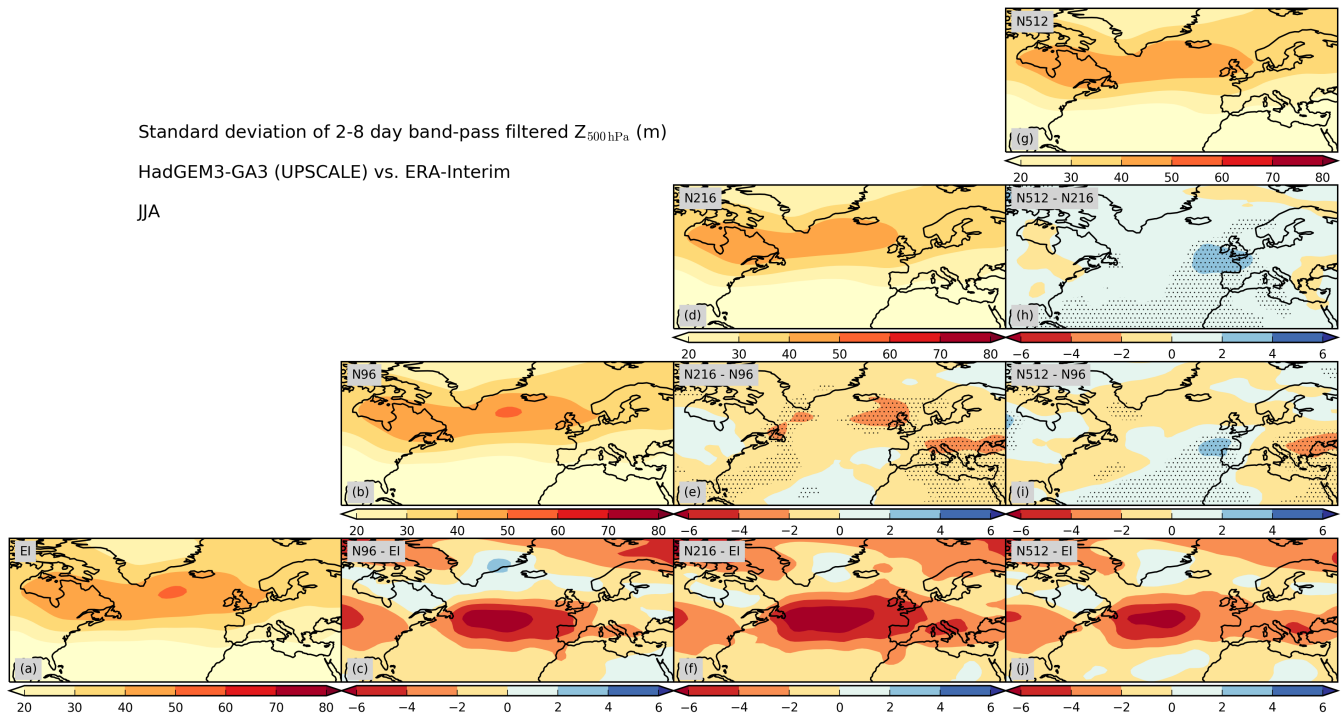

Figure S6. As Fig. S4 but for summer (June–August).

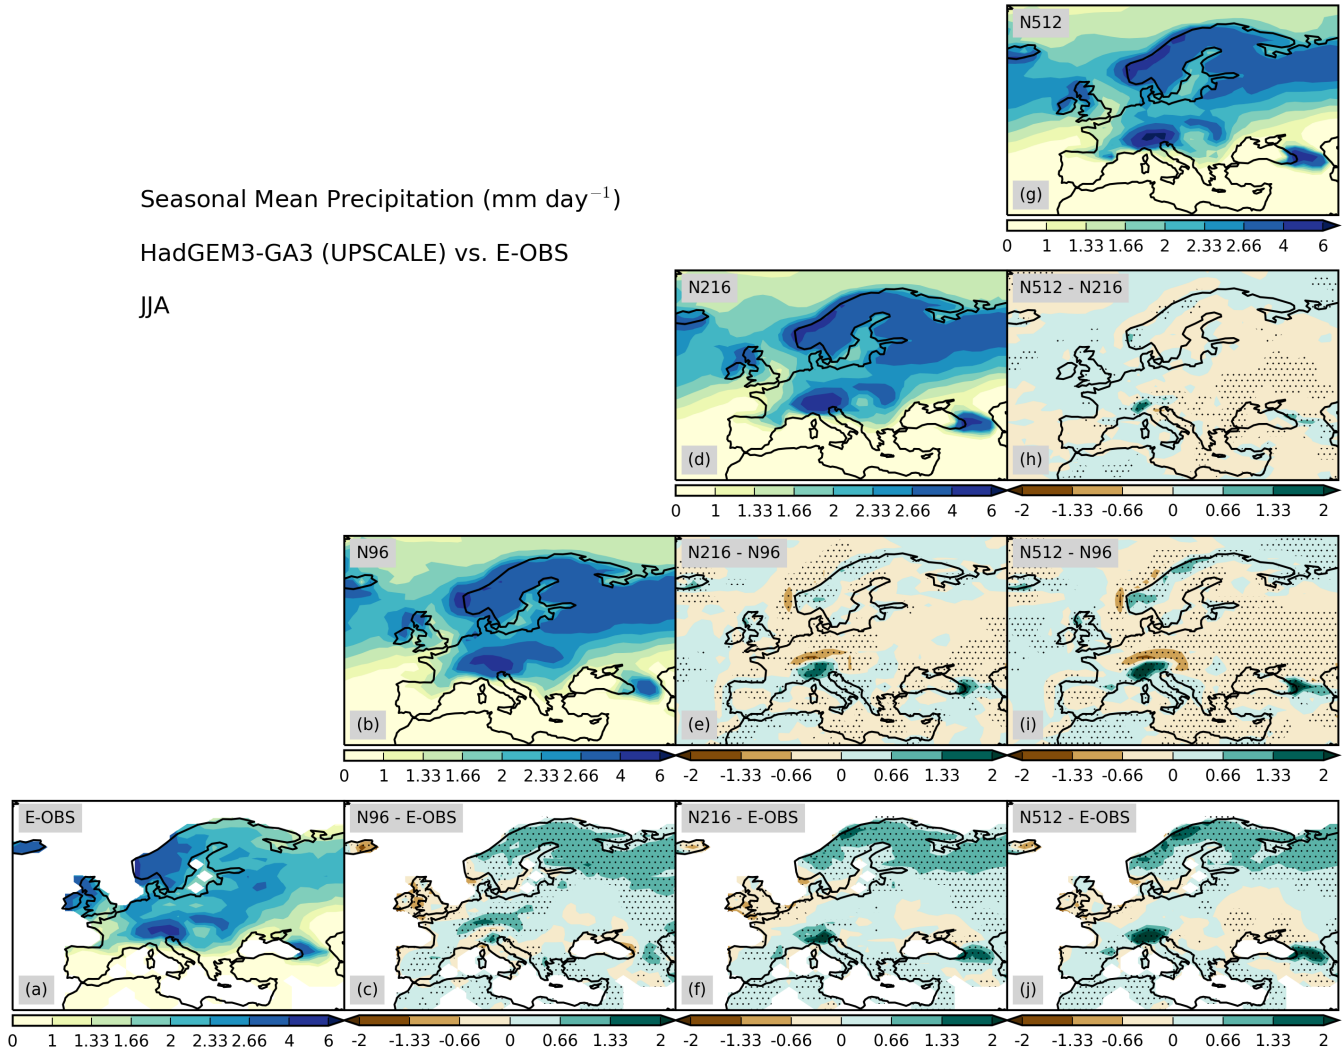

**Figure S7.** As Fig. S5 but for summer (June–August).

Standard deviation of 2-8 day band-pass filtered  $Z_{500hPa}$  (m)  
HadGEM3-GA3 (UPSCALE) vs. ERA-Interim  
SON

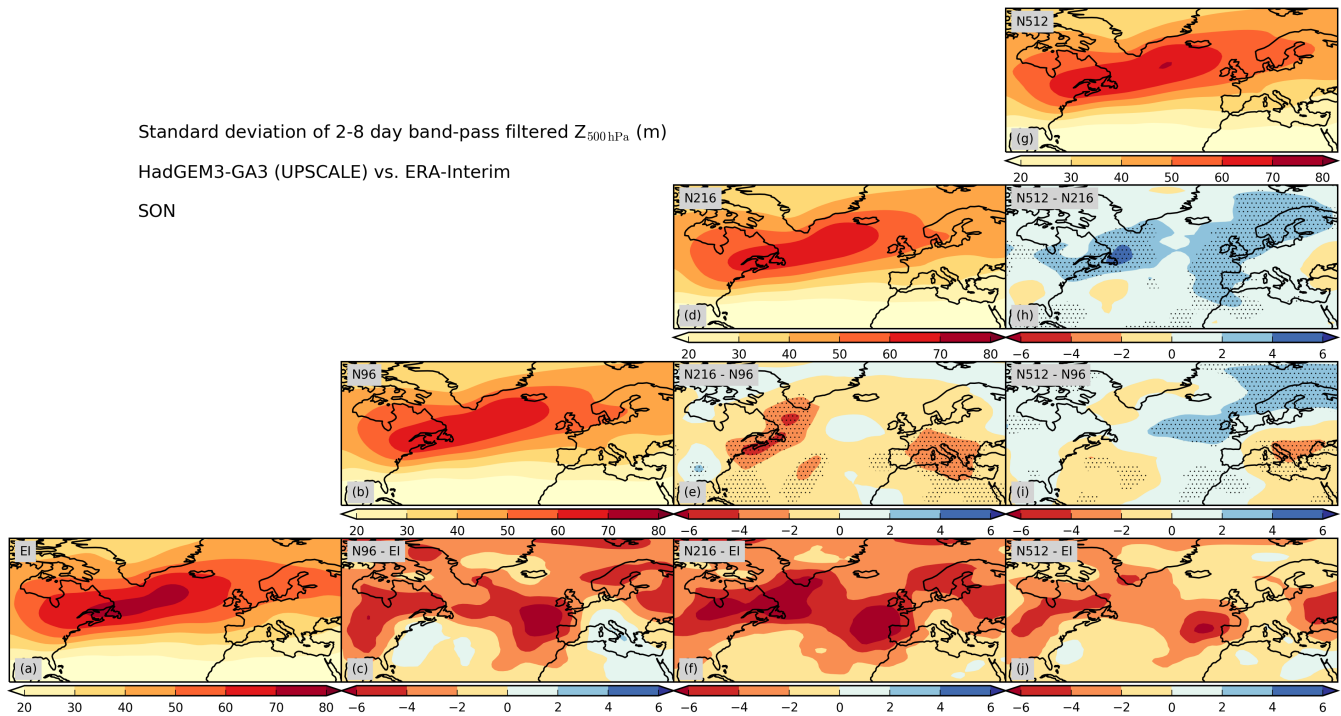

**Figure S8.** As Fig. S4 but for autumn (September–November).



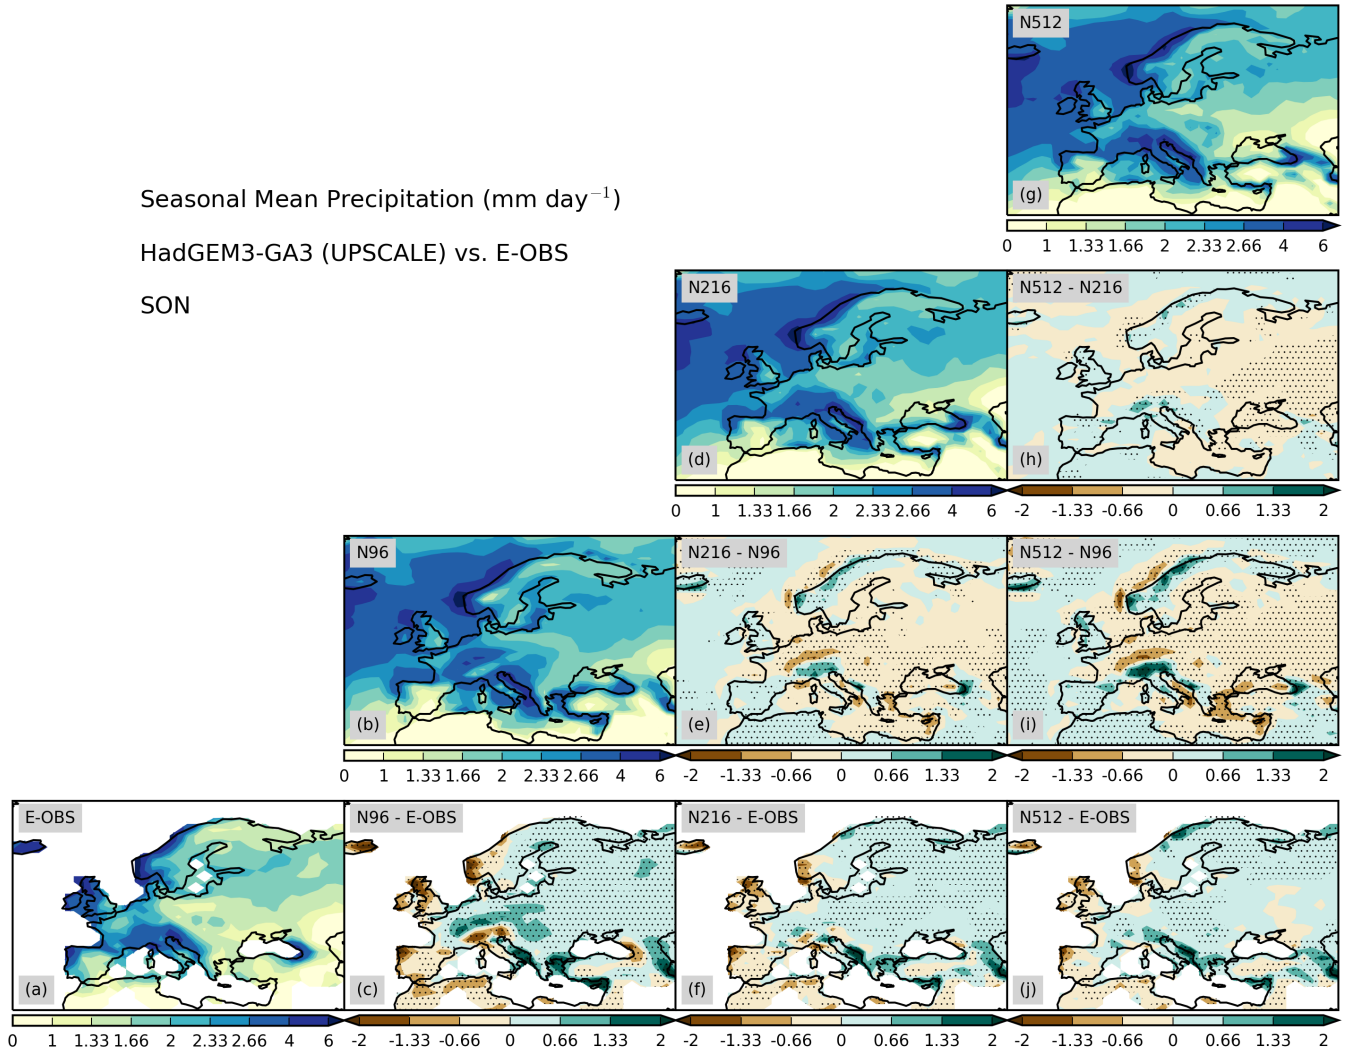

**Figure S9.** As Fig. S5 but for autumn (September–November).

Seasonal Mean Precipitation ( $\text{mm day}^{-1}$ )

HadGEM3-GA6  
N480 CTRL vs. N480 with N96 orography vs. E-OBS

MAM

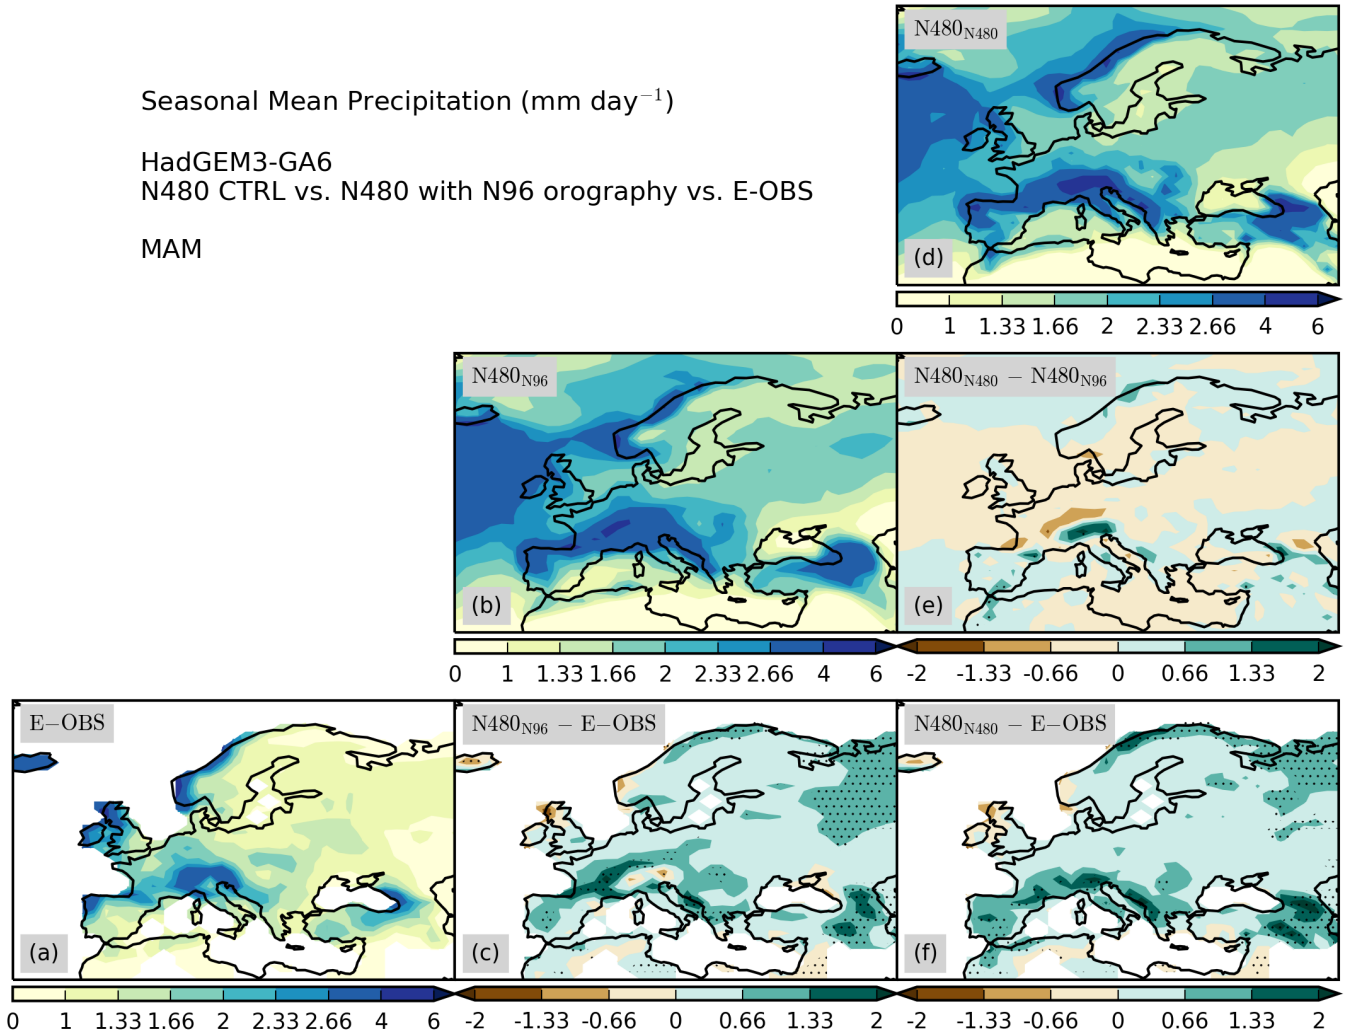

**Figure S10.** Spring (March–May) precipitation in  $\text{mm day}^{-1}$  in (a) observations (E-OBS), (b) the N480 model with N96 orography, and (d) the N480 control simulation. (c,f) Model bias with respect to E-OBS, (e) difference between the two model simulations. Stippling shows statistically significant differences.



Seasonal Mean Precipitation ( $\text{mm day}^{-1}$ )

HadGEM3-GA6  
N480 CTRL vs. N480 with N96 orography vs. E-OBS

JJA

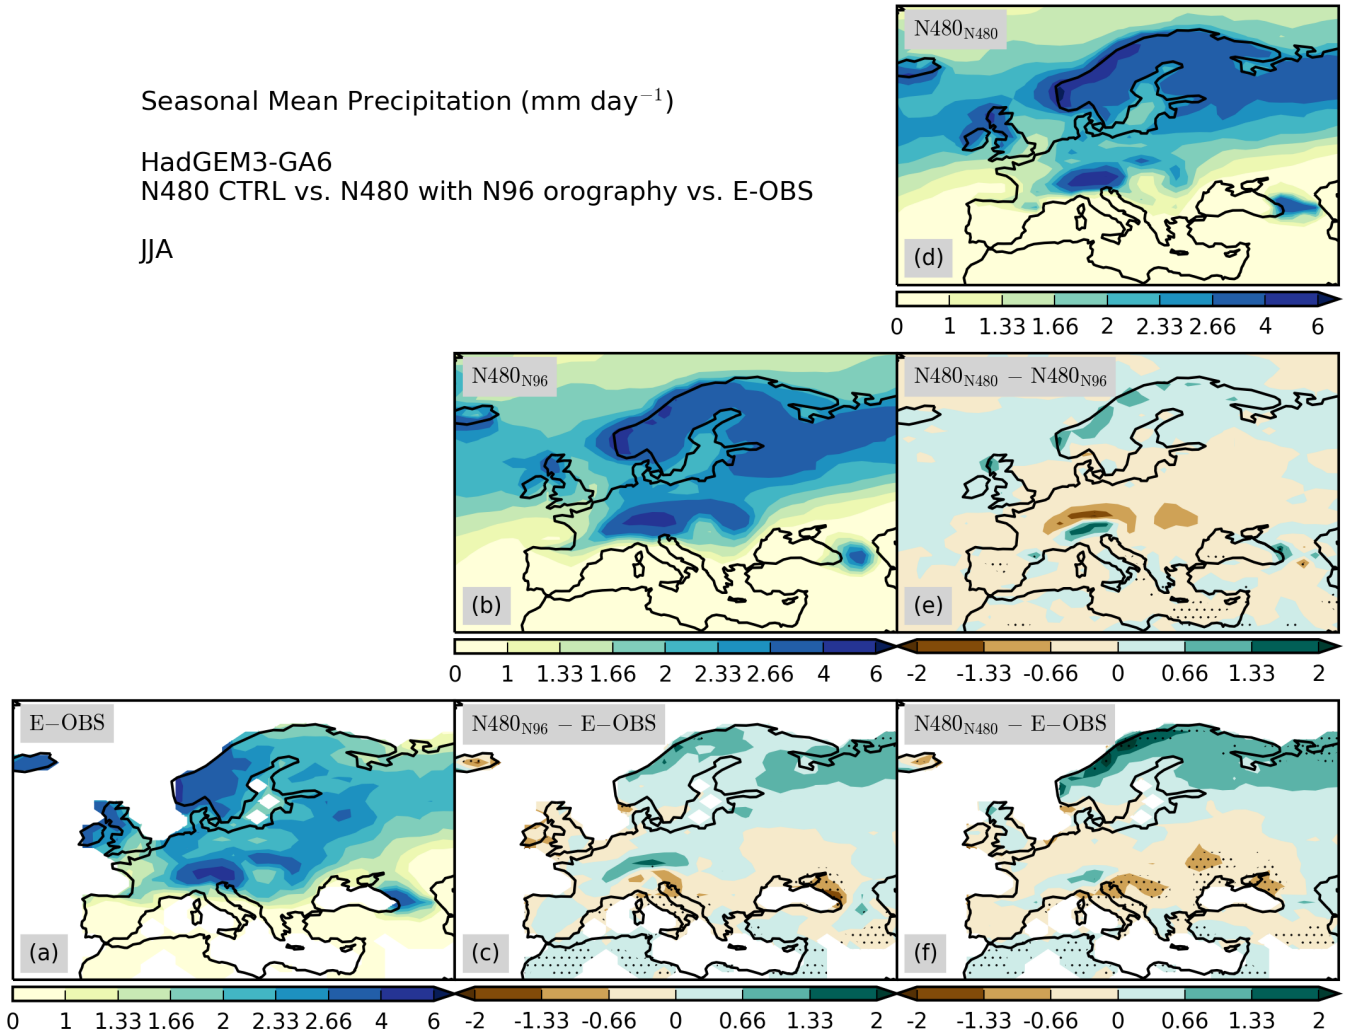

**Figure S11.** As Fig. S10 but for summer (June–August).

Seasonal Mean Precipitation ( $\text{mm day}^{-1}$ )

HadGEM3-GA6

N480 CTRL vs. N480 with N96 orography vs. E-OBS

SON

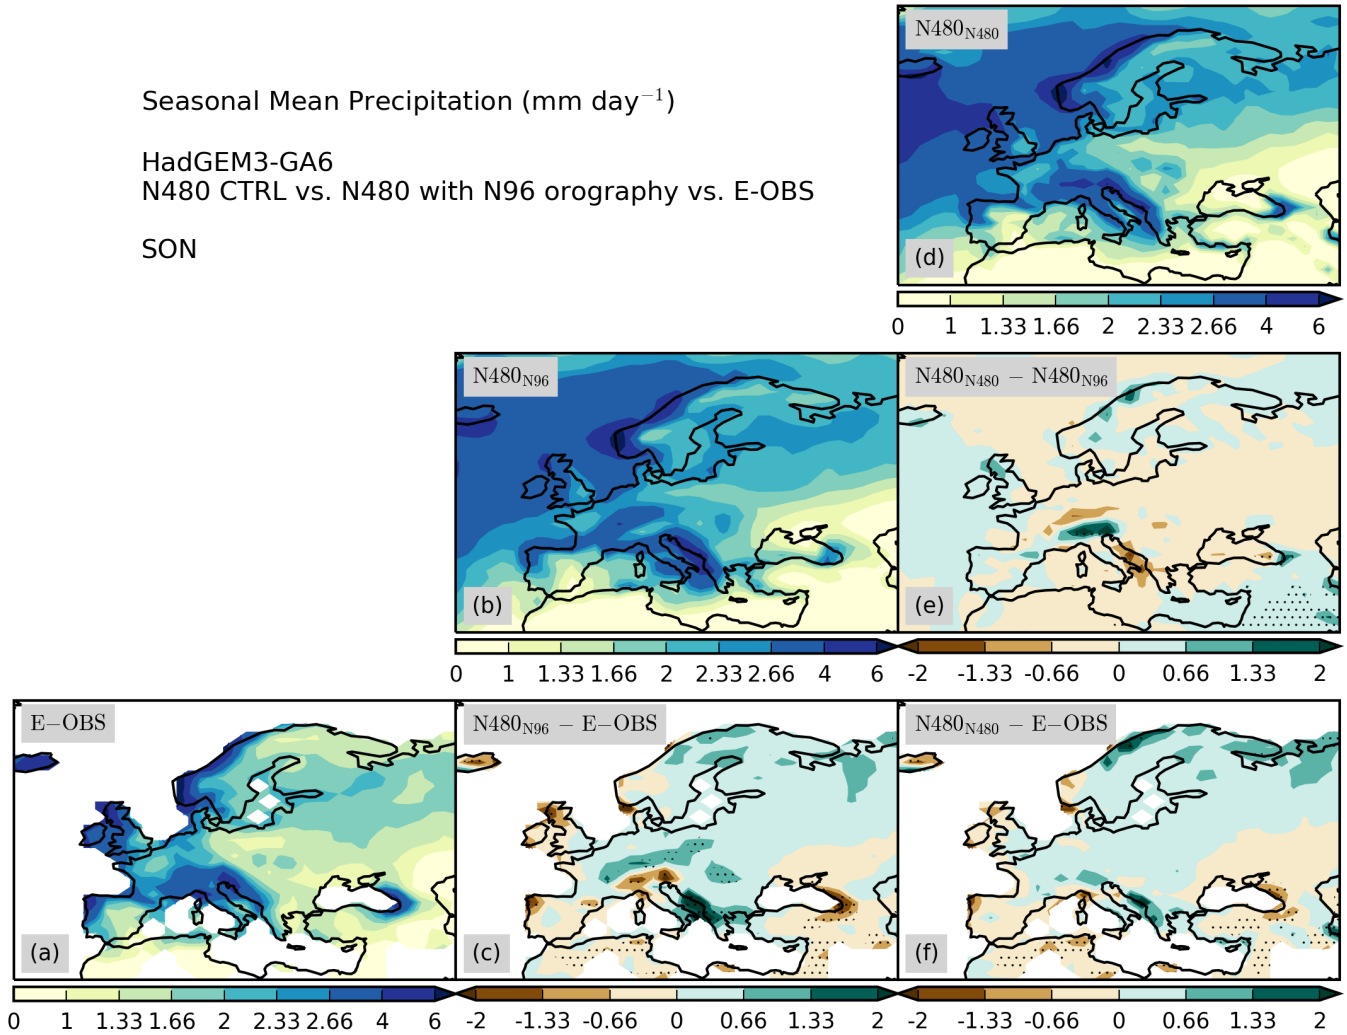

**Figure S12.** As Fig. S10 but for autumn (September–November).

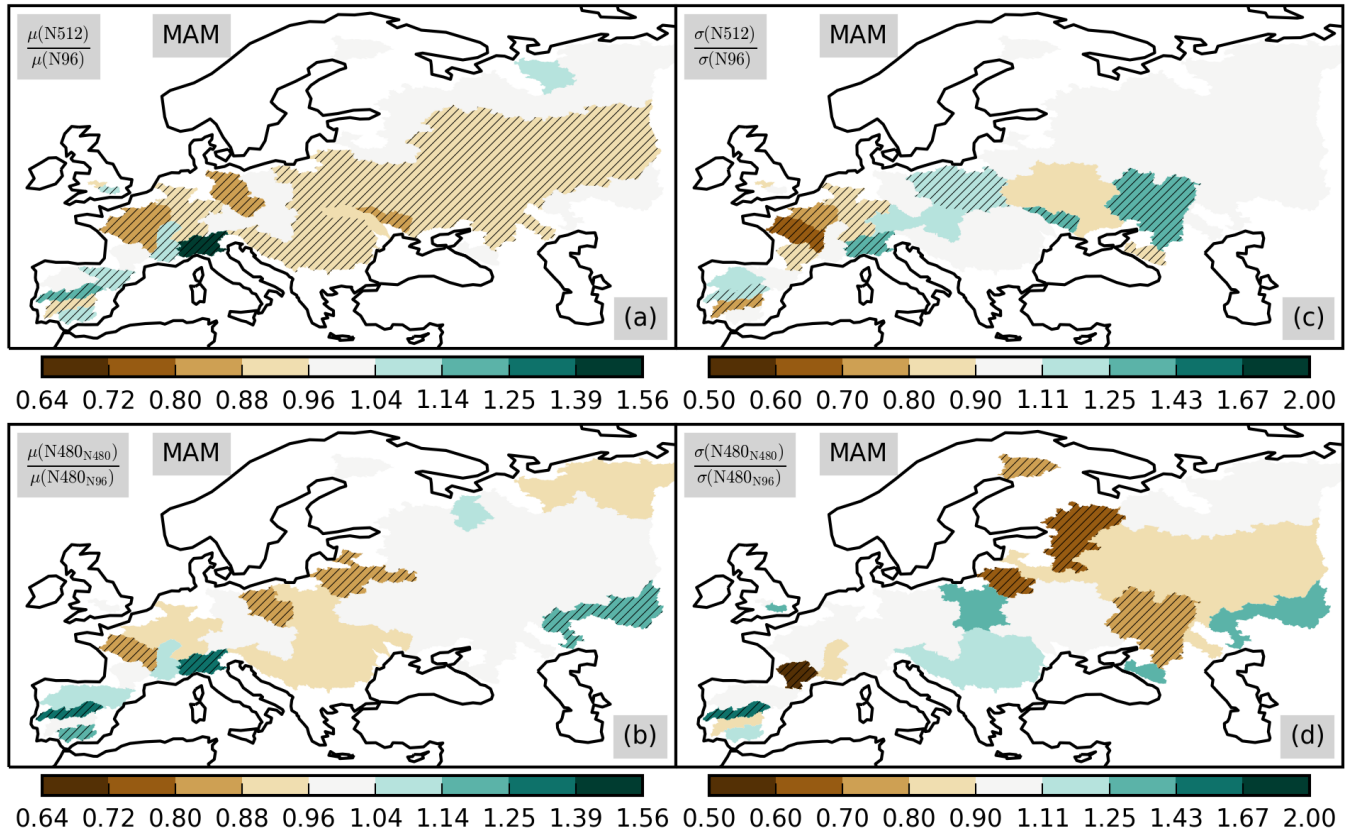

**Figure S13.** Spring (March–May) ratios of fitted GEV parameters for (a,b) the location parameter  $\mu$  and for (c,d) the scale parameter  $\sigma$ , between (a,c) the N512 and N96 simulations and between (b,d) the N480 control simulation and the N480 simulation with N96 orography. Hatching shows statistically significant differences.

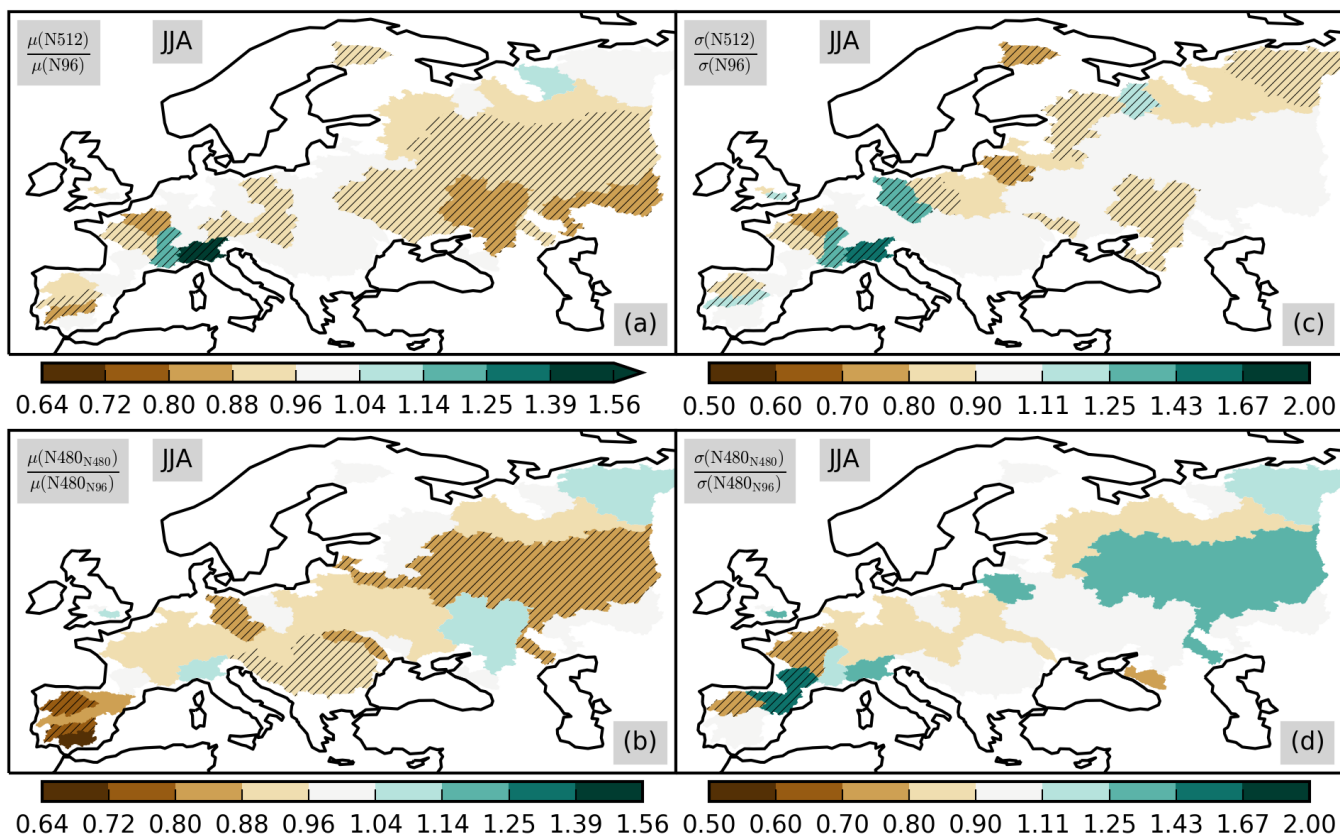

**Figure S14.** As Fig. S13 but for summer (June–August).

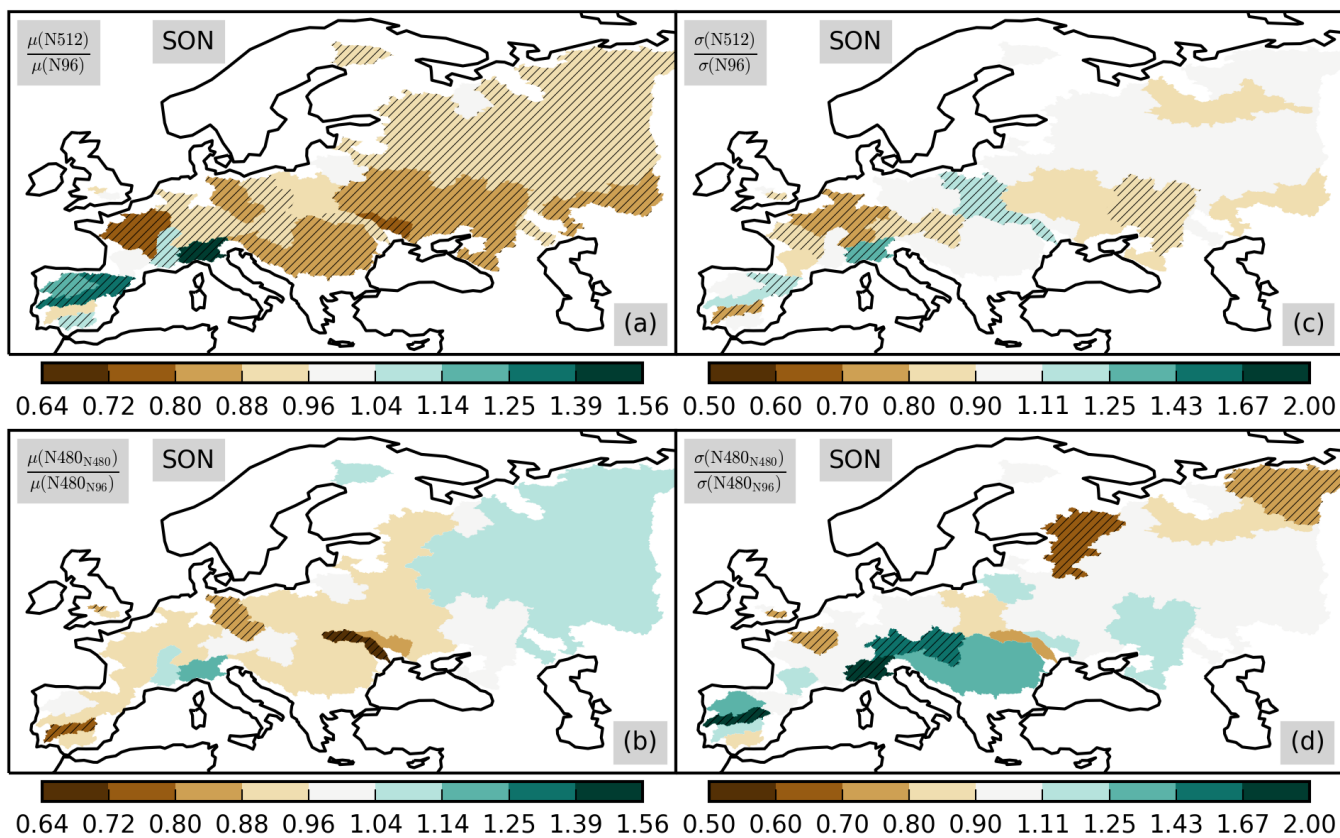

**Figure S15.** As Fig. S13 but for autumn (September–November).
